## RESEARCH ARTICLE

# Shifting roles of *Drosophila* pair-rule gene orthologs: segmental expression and function in the milkweed bug *Oncopeltus fasciatus*

Katie Reding, Mengyao Chen\*, Yong Lu<sup>‡</sup>, Alys M. Cheatle Jarvela and Leslie Pick<sup>§</sup>**ABSTRACT**

The discovery of pair-rule genes (PRGs) in *Drosophila* revealed the existence of an underlying two-segment-wide prepattern directing embryogenesis. The milkweed bug *Oncopeltus fasciatus*, a hemimetabolous insect, is a more representative arthropod: most of its segments form sequentially after gastrulation. Here, we report the expression and function of orthologs of the complete set of nine *Drosophila* PRGs in *Oncopeltus*. Seven *Of*-PRG-orthologs are expressed in stripes in the primordia of every segment, rather than every other segment; *Of-runt* is PR-like and several orthologs are also expressed in the segment addition zone. RNAi-mediated knockdown of *Of-odd-skipped*, *paired* and *sloppy-paired* impacted all segments, with no indication of PR-like register. We confirm that *Of-E75A* is expressed in PR-like stripes, although it is not expressed in this way in *Drosophila*, demonstrating the existence of an underlying PR-like prepattern in *Oncopeltus*. These findings reveal that a switch occurred in regulatory circuits, leading to segment formation: while several holometabolous insects are ‘*Drosophila*-like’, using PRG orthologs for PR patterning, most *Of*-PRGs are expressed segmentally in *Oncopeltus*, a more basally branching insect. Thus, an evolutionarily stable phenotype – segment formation – is directed by alternate regulatory pathways in diverse species.

**KEY WORDS:** Pair-rule gene, Segmentation, *Oncopeltus fasciatus*, Intermediate germ, *E75A*, Evo-devo, Milkweed bug, Hemiptera, A-P patterning

**INTRODUCTION**

Mechanisms directing the formation of the basic segmented body plan have been unraveled for the model insect, *Drosophila melanogaster* (reviewed by Wieschaus and Nüsslein-Volhard, 2016). This study identified a set of pair-rule mutants, characterized by absence of alternate body segments, revealing that patterning of single segments is preceded by pre-patterning of a double-segment-wide unit that is repeated along the anterior-posterior axis of the embryo at half the frequency of segment number. Most of the pair-rule genes (PRGs) responsible for this pre-pattern are expressed in seven stripes in the *Drosophila* blastoderm, with PRG expression foreshadowing the corresponding mutant phenotype for individual PRGs (pair-rule stripes, Fig. 1). For

example, *even-skipped* (*eve*) and *fushi tarazu* (*ftz*) are expressed in complementary seven-stripe patterns, each in the primordia of the alternate parasegments missing in *eve* or *ftz* mutants (Lawrence and Johnston, 1989). Other PRGs are expressed in similar complementary patterns, with the combined, staggered expression of the full set of seven-stripped PRGs generating unique ‘double-segment’ codes to direct the formation of body segments (Gergen et al., 1986; Graham et al., 2019; Scott and Carroll, 1987). Many of the *Drosophila* PRGs transition to segmental expression as development proceeds but mutant phenotypes reveal the earliest roles of these genes in PR patterning: roughly half-sized mutant embryos missing alternate segments (reviewed by Wieschaus and Nüsslein-Volhard, 2016).

As all insects are segmented, the gene regulatory logic underlying segmentation might be wholly conserved. However, *Drosophila* are long-germ insects with all parasegments patterned more or less simultaneously at blastoderm. This mode of development is derived and found only among holometabolous insects, where it independently arose multiple times (Davis and Patel, 2002; Liu and Kaufman, 2005b). In contrast, most insect groups add segments sequentially after the blastoderm stage (‘sequential segmentation’), from the posterior end of the germband, a region known as the growth zone or segment addition zone (SAZ) (reviewed by Davis and Patel, 2002; Liu and Kaufman, 2005b). Thus, the *Drosophila*-like PR-patterning of a double-segment unit might be restricted to simultaneously segmenting species. However, PR-like expression patterns – defined as stripes of gene expression in the primordia of alternate (every-other) segmental units – have been observed in one or more sequentially segmenting species for orthologs of each of the nine *Drosophila* PRGs (PRG orthologs): *ftz*, *fushi tarazu factor-1* (*ftz-ft1*), *eve*, *odd skipped* (*odd*), *runt* (*run*), *hairy* (*h*), *odd paired* (*opa*), *paired* (*prd*) and *sloppy paired* (*slp*). Within holometabolous insects, the expression and function of the complete set of orthologs of *Drosophila* PRGs has been examined in two species, the sequentially segmenting beetles *Tribolium castaneum* and *Dermestes maculatus* (Choe and Brown, 2007; Xiang et al., 2015, 2017). These analyses, together with studies of selected PRG orthologs in a handful of other holometabolous insects (Grbic and Strand, 1998; Kraft and Jäckle, 1994; Nakao, 2010, 2015; Rosenberg et al., 2014), suggest that a role for some PRG orthologs in *Drosophila*-style PR patterning is shared among holometabolous insects, even those with sequential segmentation (Fig. 1). However, other members of this gene set have changed in expression and/or function within Holometabola (Choe et al., 2017; Clark and Peel, 2018; Heffer et al., 2013a,b). For example, *ftz-ft1* is expressed ubiquitously in *Drosophila* but in stripes in beetles (Heffer et al., 2013b; Xiang et al., 2017) and several PRG-orthologs are expressed in the segment addition zone (SAZ) in sequentially segmenting species as components of a vertebrate-like clock-and-wave mechanism, in addition to being expressed in PR stripes (El-Sherif et al., 2012; Sarrazin et al., 2012).

In contrast to studies in holometabolous insects, there has been less focus on PRG expression or function in hemimetabolous

Department of Entomology, 4291 Fieldhouse Drive, University of Maryland, College Park, MD 20742, USA.

\*Present address: Institute of Insect Science, Zhejiang University, Hangzhou 310058, P.R. China.

<sup>‡</sup>Present address: Department of Anesthesiology, Stony Brook Medicine, Stony Brook, New York, NY 11794-8480, USA.

<sup>§</sup>Author for correspondence (lpick@umd.edu)

 L.P., 0000-0002-4505-5107

Received 11 June 2019; Accepted 12 August 2019

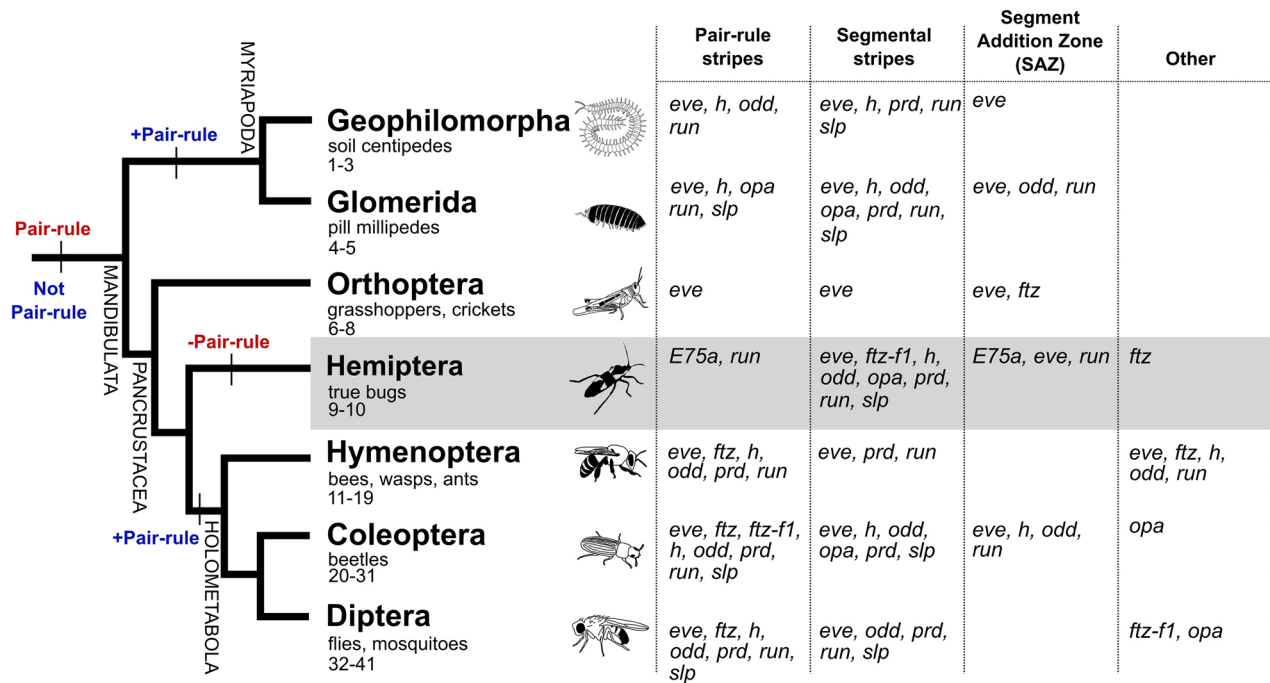

**Fig. 1. Models for the ancestral origin of PR patterning.** A simplified cladogram of arthropods with segmentation-related expression patterns of PRG orthologs in various insect and myriapod orders indicated as pair-rule-like, segmental (in every segment), SAZ (broad expression in the segment addition zone) or other. Non-segmentation-related expression patterns, such as expression in the nervous system, are not included. *Oncopeltus* is situated in the shaded region. Two hypotheses regarding the evolution of PR-like expression for the PRG orthologs are shown in red and blue on the tree. (Red) The ancestor of all arthropods exhibited PR expression of the PRG orthologs, which was subsequently lost in the lineage leading to *Oncopeltus*. (Blue) PRG orthologs were not expressed in a pair-rule manner in the arthropod ancestor, and PR-expression of these genes was gained independently in the lineages leading to myriapods and holometabolous insects. Numbered references for the expression patterns summarized here are detailed in Table S1.

insects. PR-like expression of *eve* was observed in a cricket (Mito et al., 2006, 2007), whereas in grasshoppers, *eve* and *ftz* have distinctly non-PR-like expression, both being expressed in the SAZ (Dawes et al., 1994; Patel et al., 1992). Also different from holometabolous species, *h* is expressed segmentally in a cockroach (Pueyo et al., 2008). Interestingly, PR-like expression of PRG orthologs has been observed in evolutionarily distant, non-insect arthropods. For example, striped expression at half the frequency of segmental stripes (sometimes referred to as ‘double segment periodicity’) has been observed for several PRG orthologs in a centipede (Chipman and Akam, 2008; Chipman et al., 2004; Green and Akam, 2013) and the expression of *prd* in spider mites is suggestive of modulation by a PR-like regulator (Dearden et al., 2002). These findings suggest two evolutionary hypotheses: PR expression of PRGs arose independently in holometabolous insects and myriapods (Fig. 1, blue); or it was ancestral and lost in some hemimetabolous species (Fig. 1, red). If PR-like expression of PRGs was not ancestral (Fig. 1, blue), segmental expression of the PRG orthologs may be the ancestral state. This scenario is supported by the observation that expression of five *Drosophila* PRGs evolves from a seven-stripe PR pattern to a fourteen-stripe segmental pattern, either by stripe splitting or by *de novo* addition of a second set of seven stripes (Fig. 1). In either case, these results suggest extensive rewiring of segmentation networks in arthropods. As it is clear that individual members of the PRG set can vary in function without loss of PR patterning per se (see above), it is necessary to examine the whole set of PRGs in diverse taxa before making broader conclusions about gain or loss of this patterning mechanism.

*Oncopeltus fasciatus* belongs to the order Hemiptera, a close outgroup of the Holometabola (Misof et al., 2014; Yeates et al.,

2012). PR-like expression was observed in *Oncopeltus* embryos for the gene *E75A* and RNAi resulted in fusion of neighboring segments, demonstrating the existence of an underlying PR-like pre-patterning mechanism in this species (Erezylmaz et al., 2009). However, *E75A* does not have PR-like expression or function in *Drosophila* (Bialecki et al., 2002; Buszczak et al., 1999; Segraves and Hogness, 1990). In *Oncopeltus*, *eve* is expressed in stripes in every segment (‘segmental expression’) and in the SAZ (Liu and Kaufman, 2005a). Here we have isolated and examined the expression of all nine orthologs of the *Drosophila* PRGs in *Oncopeltus* (*Of*-PRG orthologs) and seven paralogs of these genes, and have compared their expression to the only known *Of*-PRG: *E75A*. Despite the fact that *Of*-PRG orthologs are all expressed during the stages at which *Oncopeltus* specifies segments, only one (*Of-run*) is expressed in a pattern reminiscent of *Drosophila* PRGs. Most others are expressed in segmentally reiterated patterns, either in nascent segments in the anterior SAZ or in mature segments of the germband. In keeping with this, PR-like defects were not seen after RNAi-mediated knockdown of *Of*-PRG-orthologs. These results suggest that, although PR-patterning per se is retained in *Oncopeltus*, extensive re-writing has occurred such that the genes responsible for this pre-pattern are different from those in *Drosophila*.

## RESULTS

### Isolation of *Oncopeltus* orthologs of *Drosophila* pair-rule genes

Orthologs of the nine *Drosophila* pair-rule genes (PRGs), referred to throughout as *Of*-PRG orthologs, were isolated and gene structures determined (Fig. S1), combining experimental data with

information from the *Oncopeltus* genome (Panfilio et al., 2019). Because the search criteria were designed to identify all potential orthologs, we identified multiple gene family members in most cases. All matches for each PRG were subjected to phylogenetic analysis to determine which, if any, were the ortholog of interest (Fig. S2). This analysis identified orthologs of *odd-skipped* family members *odd*, *sob* and *bowl*; one *opa* ortholog; *prd/Pax3/7* orthologs *prd* and *gooseberry*; four Runt domain family members, *run*, *lozenge*, *runxA* and *runxB*; the *h* family members *h* and *deadpan*; one *slp* ortholog with 65% and 56% identity in the forkhead domain to *Dmel-Slp1* and *Dmel-Slp2*; and a single copy of *ftz-fl*, with genomic sequence on four scaffolds that were merged after experimental verification.

For *Of-ftz*, three sequences encoding a homeodomain were isolated (Figs S1, S3): *Of-ftz-A* (788 bp), *Of-ftz-B* (443 bp) and *Of-ftz-C* (965 bp). One of these, *Of-ftz-A*, was also found by RNA-seq (Ewen-Campen et al., 2011) and confirmed by us using 5'RACE. These sequences overlap in a region encoding a full-length Ftz-family homeodomain. Upstream of the homeodomain, only one of these sequences, *Of-ftz-C*, appears to have a complete open reading frame; for this sequence, an HDWM appears to replace the YPWM motif seen in Hox proteins and homeotic-type Ftz proteins (Johnson et al., 1995), and no LXXLL motif, required for interactions with Ftz-F1, was found (Heffer et al., 2010; Yussa et al., 2001). Furthermore, the characteristic Ftz N-terminal arm (Heffer et al., 2010; Telford, 2000) differs from other Ftz proteins in arthropods. Of note is the substitution at position 4 of the homeodomain: *Of-ftz* encodes a lysine at this position, while all other arthropod Ftz proteins examined share a serine or threonine (Heffer et al., 2010; Telford, 2000). The crystal structure of the *Drosophila* Engrailed homeodomain suggests that arginines at homeodomain N-terminal arm positions 3 and 5 make direct contact with DNA; these residues are conserved in *Of-Ftz* (Kissinger et al., 1990). For the shorter sequences (*Of-ftz-A* and *Of-ftz-B*), neither includes a start codon, and stop codons are present in all three reading frames (Fig. S1 and S3). In addition, *Of-ftz-A* appears to include a 300 bp unprocessed intron; canonical GT-AG splice sites were found flanking an unaligned region of the sequence (Fig. S3). The sequences of all three *Of-ftz* homeoboxes match 100% at the nucleotide level and align to scaffold 2747 of the genome assembly. The region of *Of-ftz-C* 5' of the homeobox aligns to scaffold 1144. Despite the Hox complex being greatly fragmented in the current *Oncopeltus* genome assembly, a partial *Of-Scr* sequence was annotated on this scaffold. Future experiments will determine whether the three *Of-ftz* sequences isolated are different isoforms of one *Of-ftz* gene or products of distinct *Of-ftz* paralogs.

### Temporal expression of *Of-PRG* orthologs

Genes playing roles in PR patterning are expected to be expressed first at the blastoderm stage and then throughout germband elongation, as segments are specified. Based on SYTOX green nuclear staining (Fig. S4), genes involved in segmentation should be expressed at 24–48 h after egg laying (AEL), which includes late blastoderm through early germband elongation. RT-PCR spanning the first 5 days of *Oncopeltus* development was used to determine whether *Of-PRG* orthologs are expressed at the right time to be involved in segmentation (Fig. S5). For all experiments, *Of-actin* was simultaneously amplified as an internal positive control (Fig. S5). Owing to its verified role as a PRG in *Oncopeltus* (Erezyilmaz et al., 2009), the expression profile of *Of-E75A* – with a clear peak at 24–48 h (AEL) – served as a guide for PR-like expression (Fig. S5A). Expression of *Of-eve* was detected at 0–24 h

AEL, with highest levels at 24–48 h AEL and slightly lower levels after this (Fig. S5B). *Of-odd* and *Of-slp* expression were highest at 24–72 h AEL, from the blastoderm stage through germband extension (Fig. S5C,D), whereas *Of-slp* expression continued through the fifth day of embryonic development. *Of-run* expression was also highest at 24–48 h AEL, with attenuated expression for 2 more days (Fig. S5E). *Of-ftz-fl* showed fairly consistent expression for all time points, including at 0–24 h AEL (Fig. S5F), possibly reflecting maternal deposition, seen for *Drosophila ftz-fl* (Guichet et al., 1997; Yu et al., 1997). *Of-ftz* expression appears to be highest in 0–24 h AEL embryos and expression fades thereafter (Fig. S2G). Time courses for *Of-h*, *Of-prd* and *Of-opa* expression were similar, with consistent expression detected 24–120 h AEL (Fig. S5H–J). Their continued expression after germband extension suggests additional roles later in development. In sum, all orthologs examined were detected at 24–48 h AEL, when highest expression of *Of-E75A* was also observed, consistent with roles in segmentation, although distinct profiles were seen for each gene.

### *Of-run* is expressed in a pair-rule-like manner during embryonic development

To determine whether *Of-PRG*-orthologs are expressed in PR-like spatial patterns, i.e. in stripes in the primordia of every other body segment, whole-mount *in situ* hybridization was carried out. *Of-E75A*, which is expressed in PR stripes (Erezyilmaz et al., 2009), serves as a positive control. *Of-E75A* was initially expressed in two stripes straddling the middle of the blastoderm-stage embryo, the anterior stripe being broad and diffuse, and the posterior stripe much narrower (Fig. 2A). Slightly later, three stripes were observed; this third stripe was added from the posterior, at first diffuse and later narrowing (Fig. 2B,C). A fourth stripe was observed just before gastrulation (Fig. 2D). As gastrulation proceeded, all four blastoderm-stage stripes moved toward the posterior (Fig. 2E). In early germbands, a broad stripe was observed in the SAZ with a narrower stripe just anterior (Fig. 2F). In later germbands, a pair of stripes was seen in the anterior region of the SAZ, with another weak stripe present in the segmental primordia (Fig. 2G).

Of all the *Of-PRG* orthologs examined, *Of-run* expression was the most PR-like (Fig. 2H–S'). *Of-run* was first detected in blastoderm-stage embryos, in two diffuse stripes in the center of the embryo (Fig. 2H), as well as in a posterior 'cap' (arrowhead, Fig. 2H), similar to *run* expression in beetles (Choe et al., 2006; Xiang et al., 2017). At the beginning of gastrulation, stripes 1 and 2 split, while a third primary stripe resolved from the posterior cap generating five stripes prior to gastrulation (Fig. 2I,J). The presence of two thick stripes, each of which split, is reminiscent of PR-gene expression for *prd* in *Drosophila*, and *eve*, *h* and *prd* in *Dermestes* (Kilchherr et al., 1986; Xiang et al., 2017). However, this pattern differs from *Of-E75A*, which displays strict, alternate segment, PR-like expression, with stripes never splitting. To compare expression of these genes, embryos were bisected and halves were examined for either *Of-run* or *Of-E75A* expression. At late blastoderm, when two *Of-E75A* stripes were detectable, four *run* stripes were present (Fig. 2K).

During germband elongation, the *Of-run* posterior SAZ 'cap' persisted (Fig. 2L–N). A stripe just anterior to this SAZ expression was also observed (Fig. 2M',N' arrowhead). As abdominal segments were added, dynamic expression in the SAZ was evident (Fig. 2L'–S'). In some germbands, only one stripe was observed in the anterior SAZ, and *Of-run* expression in the posterior SAZ clearly extended to the posterior edge of the germband. In

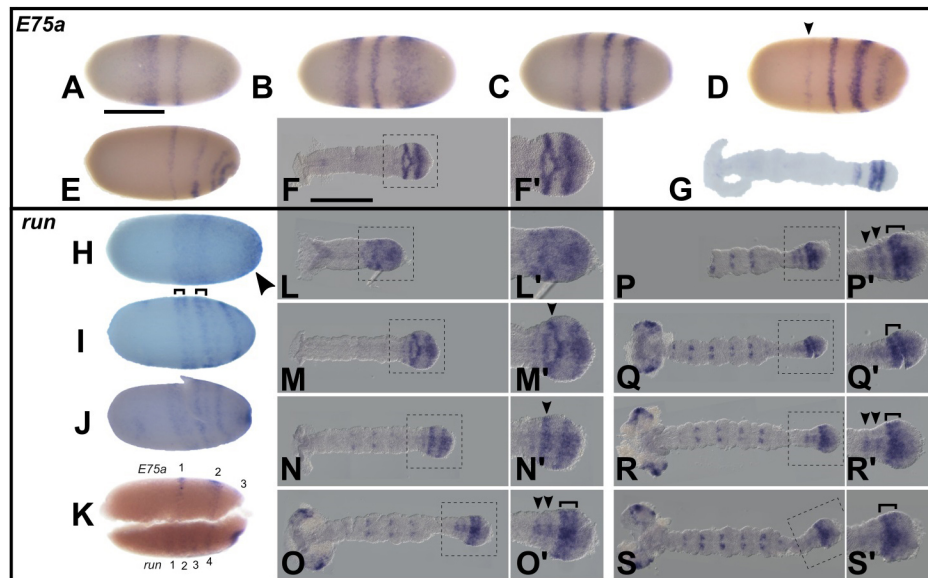

**Fig. 2. *Of-E75A* and *Of-run* are expressed in a pair-rule-like pattern.** (A-G) *E75A* expression. (H-S') *run* expression. (A-E) *E75A* was first observed as two stripes in the blastoderm. By germband invagination, four stripes were observed. (F,F') Early germbands show one stripe of expression anterior to the SAZ, and a broader stripe just posterior. (G) A later germband with one faint stripe in segmented germband and a pair of stripes in the anterior SAZ. (H) *run* was first observed in two centralized stripes and a posterior cap (arrowhead). (I) The two anteriormost stripes appear to split (brackets) while the posterior cap resolves into a stripe. (J) Five stripes observed at the onset of germband invagination. (K) Three stripes of *E75A* visible in a blastoderm-stage embryo with four *run* stripes; it is possible that the posteriormost stripes have already invaginated at this point (*E75A* stripe 4, *run* stripe 5). (L-S') Dynamic SAZ expression was observed through anaprepis in early germbands, including in some cases pairs of stripes (arrowheads) arising from the SAZ, where two-segment-wide stripes (brackets) were observed, similar to *E75A*. Embryos are oriented anterior leftwards. Scale bars: ~0.5 mm (bar in A applies to A-E,H-K; bar in F applies to F-G,L-S').

others, two stripes were evident in the anterior SAZ, and a broad stripe, which appeared to span the width of two segments, was observed just posterior (Fig. 2O,P,R), while expression was no longer present in the posterior extreme of the germband. Expression was also seen in later germbands in head lobes, and in segmentally reiterated pairs of dots around the central midline in thoracic and abdominal segments (Fig. 2Q-S). In sum, *Of-run* appears to initiate expression in a PR-like register in blastoderm embryos, with stripes splitting to generate a segmentally reiterated pattern. *Of-run* is also expressed dynamically in the SAZ, similar to *run* expression in other sequentially segmenting species. We classify *Of-run* expression as PR-like because of the initial broad stripes that split at blastoderm, as well as the appearance of stripes two-segments wide in the germband. However, a clear set of PR alternate-segment stripes, as seen for *Of-E75A*, was not observed.

#### ***Of-prd* and *Of-odd* are expressed segmentally**

Segmental expression of *Of-eve* was reported by others but is included here for completeness (Liu and Kaufman, 2005a). *Of-eve* expression was first seen in a broad domain covering about 40-100% egg length (0%, anterior pole) (Fig. 3A). This domain then split into five stripes and a posterior cap, presumably by loss of transcripts from the inter-stripe regions (Fig. 3B). At the start of germband invagination, very weak stripes were observed, with a possible sixth stripe at the far posterior (Fig. 3C). In early germbands, tightly packed stripes in and around the SAZ were observed (Fig. 3D). Six blastoderm stripes are expected for genes expressed in the primordia of every segment, as is the case for *Of-invented* (*Of-inv*), a segmentally expressed gene. [*Of-inv* was originally thought to be *Of-engrailed* (*en*) (Genbank accession number AY460340.1) (Liu and Kaufman, 2004); it has since been recognized as *invented* (Auman et al., 2017).]

*Of-prd* was first detected at the blastoderm stage, in a dark narrow stripe at ~40% egg length (Fig. 3E). Two or three very light stripes just posterior to this were barely visible. This first stripe likely corresponds to the mandibular *prd* stripe before others has been observed in other insects (Choe and Brown, 2007; Osborne and Dearden, 2005; Xiang et al., 2015). At later blastoderm, six *Of-prd* stripes were observed; the posterior-most two stripes appeared much lighter than the presumably older, more anterior stripes (Fig. 3F). The stripes moved posteriorly as the germband invaginated (Fig. 3G). In early germbands, dots of expression were seen along the midline, indicating *prd* expression in central nervous system (CNS) development as in other arthropods (Davis et al., 2005; Osborne and Dearden, 2005). A group of four new tightly packed *Of-prd* stripes arose in the anterior SAZ similar to *Of-eve*, but with expression notably absent from the posterior SAZ (Fig. 3H). The register of these nascent stripes in the germband, along with the presence of six closely spaced stripes at blastoderm, demonstrate that *Of-prd* is expressed segmentally and not in a PR-like fashion.

*Of-odd* was first detected at blastoderm as a broad stripe at ~40-80% egg length, with two or three stripes resolving from this domain (Fig. 3I). Five narrow stripes appeared as the earlier diffuse expression cleared (Fig. 3J). Occasionally, a strong-weak alternation of these stripes was observed, possibly reflecting modulation of expression by a regulator expressed in a PR pattern. An analogous alternate strong-weak pattern of stripes is seen for *Drosophila en*, likely reflecting regulation by different PRGs in alternate sets of stripes (DiNardo et al., 1985). To further test whether *Of-odd* stripes have segmental or PR register, expression of *Of-odd* and *Of-E75A* were compared in bisected embryos. It is clear that there were two *Of-odd* stripes (bottom half of embryo) for every *Of-E75A* stripe (top half of same embryo) at

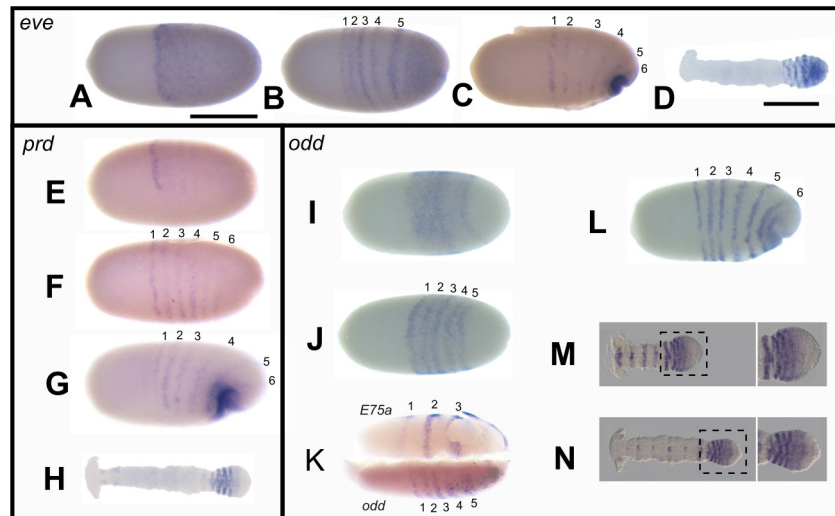

**Fig. 3. *Of-eve*, *Of-prd* and *Of-odd* are expressed segmentally.** (A-D) *eve* expression. (E-H) *prd* expression. (I-N) *odd* expression. (A-C) *eve* expression resolves into six stripes from an earlier broad domain of posterior expression in blastoderm-stage embryos. (D) *eve* expression in the germband was limited to the SAZ, with a posterior cap and tightly packed segmental stripes in the anterior SAZ. (E-G) *prd* stripe 1 arose first in early blastoderm-stage embryos, followed by five additional stripes. (H) Three or four *prd* stripes were observed in the anterior SAZ in early germbands. (I,J) Five *odd* stripes were observed in early blastoderm-stage embryos, resolving from an earlier broad domain. (K) Three *E75A* stripes and five *odd* stripes were observed in a single bisected blastoderm-stage embryo (top half, *E75A*; bottom half, *odd*). (L) A total of six *odd* stripes were seen at the onset of germband invagination. (M,N) In germbands, *odd* was observed in stripes in the anterior SAZ; stripes in the mature segments were more apparent in earlier germbands. Embryos are oriented anterior left. Scale bars: ~0.5 mm (bar in A applies to A-C,E-G,I-L; bar in D applies to D,H,M,N).

this stage (Fig. 3K). In slightly older embryos after the germband started to invaginate, a sixth stripe arose at the posterior (Fig. 3L). In mature segments of the germband, expression in the presumptive mandibular through T2 segments gradually restricted to dots along the midline and one stripe in the newest mature segment (Fig. 3M). In the anterior SAZ, a group of four stripes, similar to *Of-prd*, was observed. In later germbands, a similar pattern was observed in the SAZ, but expression had faded in the segmented germband (Fig. 3N).

In summary, *Of-prd*, *Of-odd* and *Of-eve* are expressed segmentally in blastoderm and germband stage embryos. For *Of-prd* and *Of-odd*, a cluster of stripes was observed in the anterior SAZ. The posterior cap of *odd* expression seen in beetles was not observed for *Of-odd* (Choe et al., 2006; Xiang et al., 2017). Overall, no hint of expression in a PR-like register was seen for *Of-prd*, *Of-odd* or *Of-eve*.

#### Persistent segmental expression of *Of-opa* and *Of-slp*

*Of-opa* expression was first detected in late blastoderm-stage embryos as six stripes on the lateral plates (Fig. 4A). In early germbands, before all six blastoderm stripes had invaginated, *Of-opa* stripes appeared in each segment (Fig. 4B). In later germbands, the six most anterior stripes had invaginated and persisted in each segment with weak expression just anterior to the SAZ (Fig. 4C). This persistent expression is different from *Of-odd* or *Of-prd*, where the six segmental stripes in the blastoderm eventually fade after those segment primordia become part of the germband.

*Of-slp* was first detected at blastoderm in a broad domain covering ~0-40% egg length, in a pattern complementary to that of *Of-eve* (Fig. 4D). In slightly later embryos, two stripes had emerged at the posterior boundary of this broad domain as the most anterior expression started to clear (Fig. 4E). This anterior expression had completely cleared by later blastoderm stages, leaving two close stripes at ~30% egg length (Fig. 4F). A total of seven stripes were observed at blastoderm stage (Fig. 4G,H). In early germbands,

double staining revealed *Of-slp* expression spanning the mediolateral width of each segment, anterior to each *inv* stripe (Fig. 4I). As germband elongation continued, a broad stripe of *Of-slp* expression persisted in each mature segment (Fig. 4J-O). These segmental stripes have clearly defined posterior borders but more-diffuse anterior boundaries.

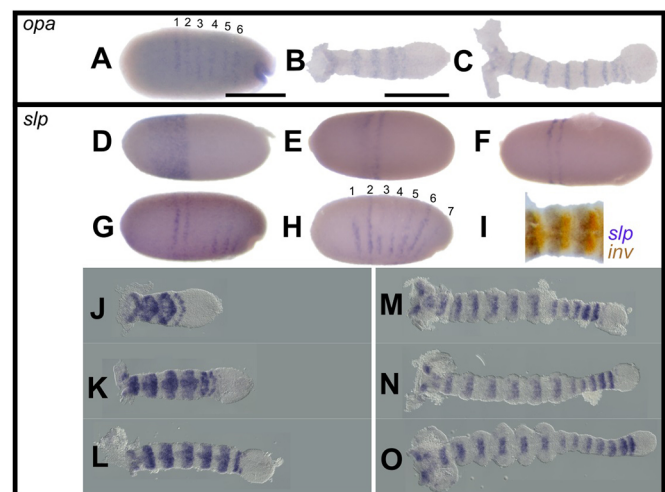

**Fig. 4. *Of-opa* and *Of-slp* are expressed in persistent segmental stripes.** (A-C) *opa* expression. (D-O) *slp* expression. (A) Six *opa* stripes were seen at blastoderm stage. (B,C) *opa* stripes persisted in the mature segments of the early germband. (D) Early *slp* expression observed in the anterior half of an early blastoderm-stage embryo. (E,F) The two anteriormost stripes arose first in the blastoderm. (G,H) A total of seven *slp* stripes observed in the blastoderm. (I) Double staining for *slp* (purple) and *inv* (orange) in an early germband. (J-O) *slp* was seen in each mature segment of the germband during elongation, and was notably absent from the SAZ. Embryos are oriented anterior left. Scale bars: ~0.5 mm (bar in A applies to A,D-H; bar in B applies to B,C,J-O).

In summary, both *Of-opa* and *Of-slp* are expressed in segmental stripes in the blastoderm, which persist through germband elongation. These genes differ from *Of-eve*, *Of-odd* and *Of-prd* in that *Of-opa* and *Of-slp* were not detected in the SAZ and their striped expression persisted in the elongated germband, similar to *slp* in *D. maculatus* (Xiang et al., 2017).

### ***Of-h*, *Of-ftz-f1* and *Of-ftz* have unique features**

*Of-h* expression was first detected later than other PRG orthologs, at late blastoderm stage, in three faint stripes (Fig. 5A). These stripes were never observed to split, and this pattern was observed at much later stages than the three-stripe pattern of *Of-E75A* (note the invagination pore in Fig. 5A). These stripes are likely the earliest manifestation of the germband expression seen slightly later. In germbands, *Of-h* stripes were observed posterior to each *inv* stripe (Fig. 5B). Notably, expression of *Of-h* appeared to lag behind that of the other genes examined, as it was observed in older, more mature, segments, rather than in the younger segments being generated from the SAZ, suggesting coordinate activation of *Of-h* stripes by gene(s) already expressed segmentally (Fig. 5C-E). Auman and Chipman (2018) also found *h* expression in two stripes in the anterior SAZ. In later germbands, new stripes were seen in the abdominal segments, in addition to expression in antennal segments (Fig. 5F). In fully extended germbands, expression in the abdomen faded away, and new expression was seen in labial through T3 segments (Fig. 5G). Later, two or three dots in thoracic appendage primordia were observed (Fig. 5H).

No blastoderm expression of *Of-ftz-f1* was detected. In germbands, two stripes were observed anterior to the SAZ during early abdominal segment addition; similar to *h*, these stripes were

weaker along the central midline (Fig. 5I). Later, only one *ftz-f1* stripe near the SAZ was observed (data not shown). Double *in situ* hybridization with *Of-inv* revealed that *Of-ftz-f1* and *Of-inv* segmental stripes are out of register with each other (data not shown).

No localized expression pattern was observed for *Of-ftz* during segmentation, using an *Of-ftz-C*-specific probe or a probe that would detect all three isoforms (Fig. S1). At later stages, segmental expression of *Of-ftz-C* was observed in groups of internal cells, presumably CNS, as has been seen for *ftz* in other species (Dawes et al., 1994; Heffer et al., 2013a) (Fig. 5J).

### **Paralogs of *Of-PRGs* are not expressed in pair-rule-like patterns**

As functional divergence following gene duplication can lead to subfunctionalization of ancestral protein functions, it is possible that, for any of the *Of-PRGs*, the ancestral gene encoded a protein with pair-rule function, and that this function was relegated to a different paralog in the lineage leading to *Oncopeltus* than that leading to *Drosophila*. To investigate whether *Of-PRG* paralogs are expressed in PR-like patterns, and thus retain potential to perform PR functions, the timing of expression of paralogs was determined by RT-PCR. *gooseberry-neuro* (*gsb-n*) was not found in the *O. fasciatus* genome or in the *H. halys* genome (Fig. S2C), suggesting loss of this gene in Pentatomomorpha. All other paralogs investigated were located in the genome and gene identity was determined by phylogenetic analysis (Fig. S2). *runxB* could not be amplified using mixed-stage 0-120 h AEL cDNA, nor could it be identified in the *Oncopeltus* embryonic transcriptome (Ewen-Campen et al., 2011); *sister of odd* and *bowl* (*sob*), *brother of odd* with *entrails limited* (*bowl*), *gooseberry* (*gsb*), *runxA*, *lozenge* (*lz*) and *deadpan* (*dpn*) were all found to be expressed within this time frame. As segmentation occurs during the first 3 days of embryogenesis, *runxA*, which was found to be expressed 72-120 h AEL, was excluded from further analysis.

Expression patterns of *sob*, *bowl*, *lz*, *dpn* and *gsb* were determined by *in situ* hybridization on 24-72 h AEL embryos. No patterned expression was observed for *lz* and *bowl*. *odd* paralog *Of-sob* was observed in an *Of-odd*-like pattern at blastoderm in six segmental stripes and later in stripes in the anterior SAZ (Fig. S6A-D). This *Of-sob* expression pattern was also found by Auman and Chipman (2018), who showed by comparison with *Of-eve* that *Of-sob* and *Of-odd* stripes overlap. Fully elongated germbands showed *Of-sob* expression in stripes in the appendages, suggesting a role in appendage patterning, as was shown for *sob* in *Tribolium* (Angelini et al., 2012). Expression of *Of-dpn*, an *Of-h* paralog, was observed in the head lobes and later along the midline, possibly in CNS primordia (Fig. S6F,G). *Of-gsb*, *prd* paralog, was observed in one stripe at blastoderm similar to early *Of-prd* expression (compare Fig. S6H with Fig. 3E), and later in each mature segment of the elongating germband. Thus, none of the paralogs are expressed in PR-like patterns.

### **Parental RNAi of some *Of-PRGs* results in severe disruption of *inv* expression**

Parental RNAi (pRNAi) was performed to assess the function of each *Of-PRG*. qPCR was used to determine relative expression and verified knockdown of each gene targeted (Fig. S7). Expression of *Of-inv* in elongating germbands was used to assay segmentation phenotypes as loss of alternate *inv* stripes would be expected after loss of PR function. RNAi knockdown of *odd* or *prd* resulted in severe defects (Fig. 6B,C). No thoracic or abdominal segmentation

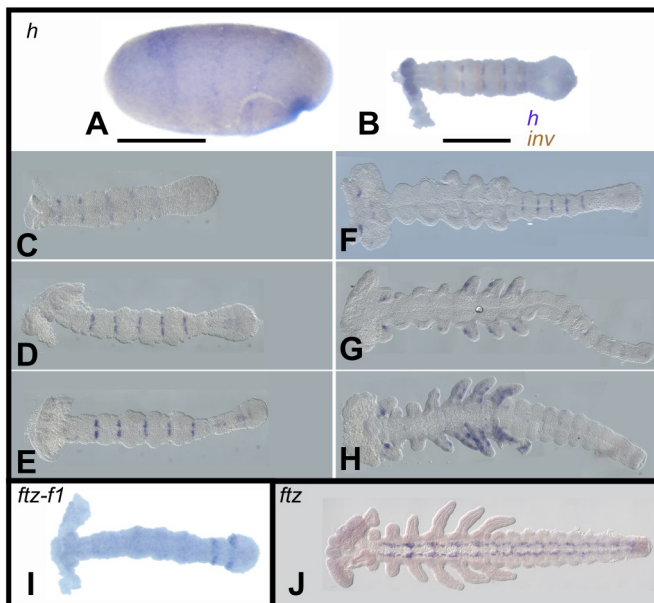

**Fig. 5. *Of-h* and *Of-ftz-f1* are expressed segmentally, while *Of-ftz* shows conserved CNS expression.** (A-H) *h* expression. (I) *ftz-f1* expression. (J) *ftz* expression. (A) At late blastoderm stage, *h* was observed in three stripes. (B) Double staining for *inv* (orange) and *h* (purple). (C-F) Segmental stripes of *Of-h* were observed through germband elongation. (G,H) In later germbands, *h* expression was observed in the limb primordia; (I) *ftz-f1* was observed in two stripes just anterior to the SAZ in the elongating germband. (J) *ftz* was observed along the midline in the presumptive CNS primordium in fully extended germbands. Embryos are oriented anterior left. Scale bars: ~0.5 mm (bar in B applies to B-J).

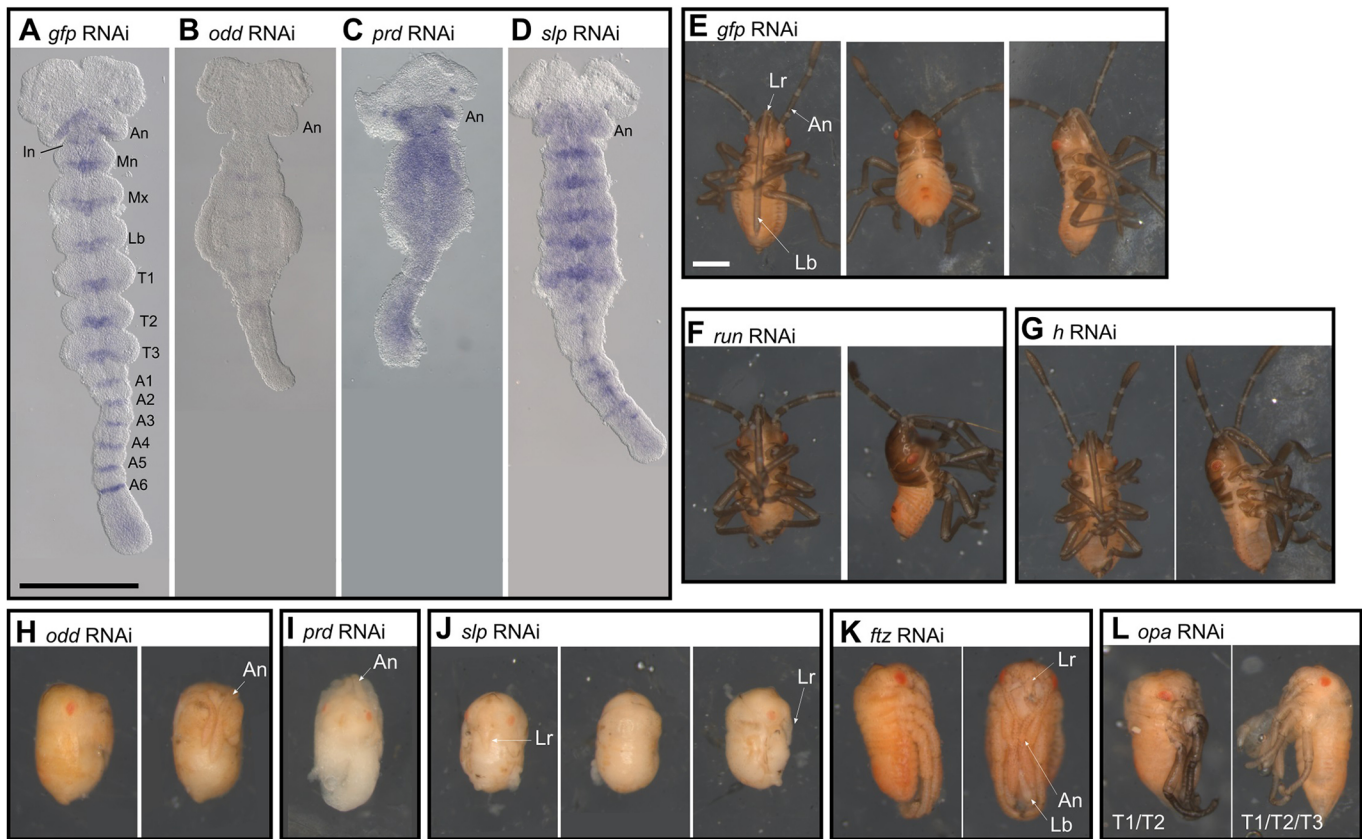

**Fig. 6. RNAi knockdown of Of-PRGs.** Parental RNAi was performed. (A) *gfp*<sup>PRNAi</sup> was used as a negative control. (B) *odd*<sup>PRNAi</sup> resulted in near-total loss of each *inv* stripe. (C) *prd*<sup>PRNAi</sup> generated background levels of *inv*, detected throughout the embryo. (D) *slp*<sup>PRNAi</sup> disrupted *inv* stripe boundaries, especially along the midline, and suppressed appendage formation. (E-G) *gfp*, *run* and *h* pRNAi hatchlings appear wild-type like. (H) *odd*<sup>PRNAi</sup> offspring show normal head and antennae, but lack differentiated thoracic appendages and wild-type abdominal segmentation. (I) truncated *prd*<sup>PRNAi</sup> offspring with clearly developed head, but lacking remaining body segments ('head-only'). (J) *slp*<sup>PRNAi</sup> offspring with distinct labrum, but lacking all gnathal and thoracic appendages, and clearly defined abdominal segments. (K) *ftz*<sup>PRNAi</sup> offspring fail to hatch due to malformed gnathal appendages. (L) *opa*<sup>PRNAi</sup> offspring display irregular thoracic appendage fusions. An, antennal segment or antenna; In, intercalary segment; Mn, mandibular segment; Mx, maxillary segment; Lb, labial segment or labium; Lr, labrum. Scale bars: ~0.5 mm.

was apparent in these shortened embryos, suggesting overall loss of segmentation, more similar to that seen in *Drosophila* segment polarity mutants than in *Drosophila* pair-rule mutants. Consistent with this, in different RNAi embryos, *inv* was undetectable, detectable in partial stripes at only very low levels (Fig. 6B) or unpatterned throughout the embryo (Fig. 6C). These effects were seen throughout the embryo, without PR-like register, indicating that *Of-odd* and *Of-prd* impact *inv* stripes in all segments. Although the *Of-prd* knockdown phenotype was fairly consistent (22/22 embryos, Fig. 6C, Fig. S8B), slightly more variation in phenotype was observed in *Of-odd*<sup>PRNAi</sup> offspring. These differences appeared to broadly stratify with different replicates, indicating that changes in dsRNA integrity or amount of dsRNA injected may cause this variation. In some *odd*<sup>PRNAi</sup> embryos, every *inv* stripe was nearly lost in every segment (15/29 embryos, Fig. 6B, Fig. S8A7-16) while in others, *inv* expression was less severely affected (14/29 embryos, Fig. S8A1-6). Auman and Chipman (2018) found fusion of maxillary and labial segments, as well as in the first and second thoracic segments after *odd* RNAi, which we did not observe. Unhatched *odd*<sup>PRNAi</sup> offspring showed severe segmentation defects, often with all thoracic appendages fused (Fig. 6H), while unhatched *prd*<sup>PRNAi</sup> offspring developed only heads (Fig. 6I). In contrast to *Of-odd* and *Of-prd* knockdown, striped *inv* expression was largely maintained in *Of-slps*<sup>PRNAi</sup> embryos, although five rather than six stripes were

consistently observed in the gnathal/thoracic region (23/23 embryos, Fig. 6D and Fig. S8C). Stripes appeared expanded, especially along the midline. As *Of-slps* stripes are offset from *inv* stripes (Fig. 4I), this expansion suggests that *Of-slps* represses *inv* but without PR-like register. These embryos showed no clear morphological segmentation and failed to develop appendages (Fig. 6J), as found by Auman and Chipman (2018).

Females injected with dsRNA targeting *Of-ftz-1* failed to lay eggs, and dissection revealed that the ovaries of injected females were abnormal, containing oocytes of about the same size along the length of the ovariole (Fig. S9), similar to those seen after *Tribolium* and *Dermestes ftz-1*<sup>RNAi</sup> (Heffer et al., 2013b; Xiang et al., 2017; Xu et al., 2010). RNAi knockdown of *Of-PRGs* *ftz*, *h*, *run* and *opa* did not impact *Of-inv* expression compared with *gfp* controls (47/47, 8/8, 27/27, 166/167 and 37/37 embryos examined, respectively). Although hatch rates were severely suppressed for all concentrations of *Of-opa* dsRNA tested, no effect was observed on *inv* stripes (Fig. S10). Examination of unhatched first-instar offspring revealed irregular fusions of thoracic appendages (Fig. 6L), suggesting that *Of-opa* is required to maintain segment boundaries later in embryogenesis. For *Of-h*, *Of-ftz* and *Of-run*, hatch rates were only slightly lower than controls (Fig. S10). Cuticular defects were observed after *Of-ftz*<sup>PRNAi</sup> (Fig. 6K) in which the maxillary and mandibular segments appeared undifferentiated, similar to

*Of-Scr*<sup>pRNAi</sup>, suggesting possible off-target effects; however, the labium appeared similar to wild type, in contrast to the distinct labial to antenna or leg transformation observed after *Of-Scr* knockdown (Hughes and Kaufman, 2000). No defects in body patterning were observed in *Of-run* or *-h* pRNAi offspring (Fig. 6F,G). In most cases, more than one dsRNA sequence was tested at multiple concentrations for each gene. Levels of knockdown, as measured by qPCR for these genes, were similar to those for genes showing abnormal *inv* expression (*Of-odd*, *Of-prd* and *Of-slp*), suggesting that RNAi was effective (Fig. S7). However, functional inference from RNAi is suggestive but not definitive; future experiments will be required to generate genomic deletions of these genes to more conclusively assess their function. In summary, for those PRG orthologs showing RNAi defects in early embryos, all segments were affected equally. Thus, these genes do not appear to function in a PR-like manner in *Oncopeltus*.

## DISCUSSION

We isolated and examined the expression patterns and functions of orthologs of the nine *Drosophila* PRGs, as well as their paralogs, in *Oncopeltus*. This is, to our knowledge, the first examination of the complete set of PRG orthologs in a hemimetabolous insect. Using this candidate gene approach, we found that only one ortholog, *Of-run*, is expressed in a striped pattern reminiscent of *Drosophila* PRGs. However, unlike *Of-E75A*, which shows PR-like expression, *Of-run* was not observed in a striped pattern in alternate segments in the blastoderm, but rather in two broad stripes that then split, and no pair-rule defects were observed after knockdown. Most *Of*-PRG orthologs were expressed segmentally during blastoderm and germband development. The finding that all *inv* stripes were impacted after *Of-odd*, *Of-prd* or *Of-slp* RNAi knockdowns suggests that these genes are involved in the specification or boundary formation of every segment. This function resembles that of *Drosophila* segment polarity genes. Among the *Of*-PRG-orthologs expressed segmentally, distinct temporal and spatial classes were observed. *Of-eve*, *Of-odd* and *Of-prd* were expressed in six segmental stripes in the blastoderm with segmental register in germbands in a transitional zone between the posterior SAZ and the segmented germband. This is of interest because segmental stripes appear to emanate directly from the SAZ. In contrast, *Tribolium* orthologs expressed in the SAZ emerge with PR periodicity. *Of-opa* and *Of-slp* were observed in a similar segmental pattern in the blastoderm and were later seen as persistent stripes in each mature segment of the germband, but were absent from the SAZ. *Of-h* and *Of-ftz-f1* were observed in stripes only at later stages in the mature germband; these stripes appear to be more spatially restricted. *Of-ftz-f1* was never seen in more than two stripes anterior to the SAZ; *h* was present in sets of stripes, either in anterior or in posterior segments, just posterior to *Of-inv* in germbands. The temporal differences in expression of these genes, along with the increasingly restricted spatial localization of the stripes, suggests a regulatory hierarchy among them. If indeed PR expression for this gene set was ancestral (Fig. 1, red), a coordinated shift in their expression patterns from PR-like to segmental could be explained by cross-regulatory interactions.

While this work was in progress, Auman and Chipman (2018) examined expression of *Of-odd*, *Of-opa*, *Of-slp*, *Of-h* and *Of-run* during germband elongation, and tested RNAi knockdown of *Of-odd* and *Of-slp*. Their results were largely similar to those shown here. Our study differs from their study in that we analyzed expression and function for the full set of *Of*-PRGs, including *Of-ftz*, *ftz-f1* and *prd*, as well as paralogs. Furthermore, a major goal of

our approach was to determine whether these genes were expressed in PR-like register. For this, we focused on examination of expression of each gene at the blastoderm stage, where stripe register can be determined clearly by comparison with the one known *Oncopeltus* gene expressed in a PR-like pattern: *Of-E75A* (Fig. 2). Comparison with *Of-E75A* expression, including examination of expression in bisected embryos (Figs 2K and 3K) allowed us to make strong conclusions about the mode of expression of *Of*-PRG orthologs.

Are orthologs of *Drosophila* PRGs involved in an ancestral PR mechanism? Orthologs of *Dmel*-PRGs are expressed in PR-like patterns in a number of holometabolous insects (Aranda et al., 2008; Choe et al., 2006; Rosenberg et al., 2014; Wilson and Dearden, 2012; Xiang et al., 2017), although expression of individual orthologs in different species varies (Fig. 1), as mentioned in the Introduction. This variation among PRG orthologs in Holometabola may reflect an evolutionary reshuffling of functions within one level of a regulatory hierarchy. In hemimetabolous insects, the situation appears to be different: here, we have found absence of PR-like expression or function for most of the PRG orthologs and their paralogs. Although the full set of PRG orthologs has not been examined in other hemimetabolous insects, there is variability in the degree of conservation of expression and function for those orthologs that have been studied. For example, in grasshoppers, neither *eve* nor *ftz* is expressed in stripes (Dawes et al., 1994; Patel et al., 1992); however, *eve* is expressed in broad, PR-like stripes that split to generate segmental expression in the cricket (Fig. 1; Mito et al., 2007). In contrast, an ancestral role for PRG orthologs in patterning a double segment repeat has been suggested from studies of myriapods. In particular, in the centipede *Strigamia maritima*, orthologs of *odd* (*Sm-odr1*), *eve*, *run* and *h* are expressed in stripes that appear in alternate segmental intervals (Chipman and Akam, 2008; Chipman et al., 2004). There is also some evidence for PR-like expression of PRG-orthologs in the millipede *Glomeris marginata*, based on the finding that initial expression of a number of these genes (*eve*, *run*, *h*, *slp* and *opa*) is in double- or multiple-segment-wide domains, which then split into segmental stripes (Janssen et al., 2012). This differs from *Drosophila*, where no single PRG is expressed in a stripe spanning a double segment primordia; the widest PR stripes are those of *prd*, which are broader than other PRGs but do not span an entire double segmental unit (Gutjahr et al., 1993). The ‘double segment’ prepattern inferred for *Drosophila* PR patterning arises from the complementary expression of different PRGs. Thus, these wide PRG-ortholog stripes are not necessarily reflective of a *Drosophila*-like mechanism. However, an underlying PR mechanism is suggested by the fact that, as seen in the spider mite (Dearden et al., 2002), the *Glomeris prd* ortholog is expressed in segmental stripes that are stronger in alternate segments (Janssen et al., 2012).

These findings highlight the distinction between PR pre-patterning as a developmental mechanism, and the specific genes identified in *Drosophila* that control this process. PR-like pre-patterning occurs in *Oncopeltus* largely or wholly independently of the set of PRGs that play this role in holometabolous insects. *E75A*, which has no PR-like expression in *Drosophila* (Wilk et al., 2013), is expressed in the primordia of alternate body segments in *Oncopeltus* (Erezyilmaz et al., 2009; Fig. 2), demonstrating that an underlying PR-type mechanism exists in *Oncopeltus*. Interestingly, PR-like expression in *Oncopeltus* is also seen for *Toll*-like genes, which are downstream targets of PRGs in *Drosophila* (Benton et al., 2016; Graham et al., 2019; Paré et al., 2014) (data not shown). As the *Drosophila* regulators of these *Toll* gene PR patterns are non-PR



in *Oncopeltus*, the regulatory interactions controlling their expression must have been re-wired in one of these lineages. Thus, although there is little overlap between *Oncopeltus* and *Drosophila* in the sets of genes responsible for the initial subdivision of the embryo into double segment repeats, PR pre-patterning is part of the ‘regulatory logic’ by which the embryo is sequentially subdivided into increasingly specified units. The endpoint of this process – segment formation – is highly stable during evolution, but the regulatory pathways directing it have diverged, a phenomenon termed developmental systems drift (Haag, 2014; True and Haag, 2001), which we refer to as ‘phenotypic stability’.

We close with an historical note of interest. Before geneticist Peter Lawrence shifted the focus of his career to the *Drosophila* model system, he did extensive research on *Oncopeltus* segmentation (Lawrence, 1966, 1973; Lawrence and Green, 1975). Through clonal analysis of irradiated embryos, he showed that patterning of segments begins at the blastoderm stage of *Oncopeltus*. Given the complexity of PR patterning in *Drosophila* and other holometabolous insects, we expect that, in addition to *E75A*, other genes with PR function remain to be discovered in *Oncopeltus*. It is therefore not a stretch to speculate that if Lawrence had continued his studies of segmentation in *Oncopeltus*, we might be referring to a whole different set of regulatory genes when thinking about PR patterning in insects. This example is one of many that underscores the importance of studying diverse experimental systems to understand biodiversity at the regulatory level; limiting our studies to a handful of organisms inevitably biases our understanding of developmental processes.

## MATERIALS AND METHODS

### Insect rearing and embryo collection

*Oncopeltus*, originally purchased from Carolina Biological and maintained in our lab for several years, were reared in 30×18×20 cm plastic cages on a diet of water and raw organic sunflower seeds at 25±1°C, 50% relative humidity with a photoperiod of 16 h light:8 h dark. At the beginning of a collection period, a piece of cotton on top of a section of paper towel was placed in the cage; the towel barrier ensured that no older embryos already in the cage would be collected. At the end of the collection period, the cotton was removed from the cage and kept at 25°C until embryos reached the appropriate age.

### Gene isolation, embryo fixation and *in situ* hybridization

PRG orthologs were isolated using standard methods (see supplementary Materials and Methods for further details). Embryo fixation and *in situ* hybridization were carried out as described by Liu and Kaufman (2004) with modifications made by Ben-David and Chipman (2010) and by our lab (see supplementary Materials and Methods for further details). Antisense RNA probes were synthesized using digoxigenin or fluorescein RNA labeling mix (Roche) and templates generated by PCR amplification of staged cDNA with reverse primers containing the T7 promoter sequence. The T7 RNA transcription reaction was carried out at 37°C for 2 h, followed by precipitation in ice-cold ethanol and LiCl. *In situ* hybridization was carried out as previously described (Ben-David and Chipman, 2010 or Liu and Kaufman, 2009), with the addition of a 1 h 5% BSA blocking step prior to blocking with 10% sheep serum. BCIP/NBT was used most often as the chromogenic substrate for alkaline phosphatase; in the case of double *in situ*, BCIP/INT was used to produce an orange product. As our original probes were designed to hybridize to conserved domains, we designed additional probes for *odd*, *prd*, *run* and *slp* that were gene specific to ensure that our results were not obscured by cross-hybridization with related genes. Gene specificity was confirmed by conducting a BLAT search of the *Oncopeltus* genome using the probe sequence as the query; if only the sequence of the target gene matched the probe sequence, we considered the probe to be gene specific. We confirmed with *odd*, *prd*, *run* and *slp* that the gene-specific probes (Fig. S1, labeled probe

2 or 3) gave the same results as the less specific probes (Fig. S1, labeled probe 1).

### Imaging

Blastoderm-stage embryos were photographed in PBST. In blastoderm-stage embryos, the anterior pole is somewhat tapered; this morphological feature was used to orient embryos anterior-left. Otherwise, germbands were dissected out, transferred to glycerol and mounted on a slide. Imaging was carried out using an AxioCam MRC camera (Zeiss) mounted on a StEREO Discovery.V12 dissecting microscope (Zeiss) or Axio Imager.M1 compound microscope with DIC (Zeiss). When necessary, image stitching was performed in Fiji using the pairwise stitching plug-in (Preibisch et al., 2009) or Adobe Photoshop.

### Parental RNAi

Double-stranded RNA for RNAi was synthesized using the Megascript T7 Transcription Kit (Invitrogen); dsRNA target regions are shown in blue in Fig. S1. The template for the RNA synthesis reaction was produced by PCR of cloned sequence fragments, using primers with the T7 promoter sequence at the 5′ ends. The RNA synthesis was allowed to proceed for 16 h at 37°C, then treated with TURBO DNase and annealed in a thermocycler. Each 20 µl reaction of double-stranded RNA was precipitated with 30 µl of 7.5 M lithium chloride and 250 µl ice-cold ethanol and then resuspended in injection buffer (5 mM KCl, 0.1 mM phosphate buffer pH 6.8). A 1:100 dilution of each dsRNA was run on an agarose gel to check that dsRNA was indeed present and the expected size.

Anticipating possible variability in effect between different dsRNAs, we tested three different concentrations per dsRNA (10, 15 and 20 µg), injecting two or three females with each concentration. Embryos were collected daily and the hatch rate was tracked for 3–4 weeks post-injection, or until injected females died (Fig. S10). One of the longest-living females, injected with 15 µg *prd* dsRNA, continued to lay clutches that failed to hatch 31 days after injection, a much longer penetrance than that reported previously in this species (Liu and Kaufman, 2004). The remaining experiments were performed with the lowest concentration of dsRNA that produced a noticeable effect on the hatch rate. For some dsRNAs (*h*, *run*, *opa* and *fz*) no effect on hatch rate was observed even at the highest concentration tested. For these, additional experiments were performed with the highest concentration. Adult females were injected with dsRNA corresponding to each *Of*-PRG-ortholog about 1 week after molting from L4 to adult. Injections were carried out in triplicate, with 3–5 females per group for each gene. Double-stranded *gfp* RNA was injected as a control. One day after injection, an equal number of males was added to each cage. Embryos were collected daily and divided such that some were allowed to hatch, some were fixed at 48–72 h AEL for subsequent staining by *in situ* hybridization with an *inv* probe, and some were frozen in TRIzol at –80°C at 24–48 h AEL (*odd*, *prd*, *slp*, *h*, *run*, *fz* and *gfp*) or 35–50 h AEL (*opa* and *gfp*). A tighter staging of *opa* RNAi embryos was necessary to ensure embryos used for RNA extraction were expressing *opa*. An additional dsRNA from a different part of the gene sequence was tested for *prd*, *odd*, *slp*, *h*, *run* and *opa* in a separate round of experiments (Fig. S1, red). Results were largely similar; defects seen for *slp* with this dsRNA were weaker; however, no defects were seen for *Of-odd* with this second dsRNA, which matched the *odd* 3′UTR. Thus, it is possible that defects shown above and by Auman and Chipman (2018) reflect knockdown of both *Of-odd* and *Of-sob*, which appear to be expressed in the same pattern (compare Fig. 3I–N to Fig. S6A–D).

### Quantitative RT-PCR

qPCR was performed using 24–48 h AEL (*prd*, *odd*, *slp*, *fz*, *h* and *run*) or 35–50 h AEL (*opa*) RNA from RNAi embryos. RNA was extracted using TRIzol (Invitrogen), DNase treated using the TURBO DNA-free kit (Invitrogen) and cDNA was transcribed using the iScript cDNA Synthesis kit (Bio-Rad). PCR was performed in a Roche LightCycler 480 real-time PCR machine, using the Luna Universal qPCR master mix (NEB). *TATA-box binding protein* (*Tbp*, found on scaffold 2359 of the *Oncopeltus* genome) was used as the reference gene as it was found to have the most stable expression of three candidate reference genes tested, and has been

used as a reference gene in many other studies (Liang et al., 2014; Niu et al., 2014; Zhai et al., 2014). The  $2^{-\Delta\Delta CT}$  method was used to calculate fold change of gene expression relative to the *gfp* control. Statistical significance was determined by performing a Welch two-sample *t*-test in R with  $\alpha=0.05$ . All primer sequences are listed in Table S2.

### Phylogenetic analyses

To conduct phylogenetic analyses of our candidate ortholog sequences, alignments of orthologous sequences were generated using MUSCLE (Edgar, 2004). Alignments were then trimmed using Aliview (Larsson, 2014). Finally, phylogenetic analysis was carried out in TOPALi v2.5 using the Bayesian algorithm MrBayes (Milne et al., 2009; Ronquist and Huelsenbeck, 2003). Additional formatting of trees was performed in MEGA6 (Tamura et al., 2013). See supplementary Materials and Methods for more details on determination of paralogous and orthologous gene relationships.

### Acknowledgements

We thank Lakshmi Kirkire for keeping this project going after Y.L., Jie Xiang and Patricia Graham for technical advice and suggestions, and Jessica Hernandez for technical assistance.

### Competing interests

The authors declare no competing or financial interests.

### Author contributions

Conceptualization: K.R., L.P.; Methodology: K.R., M.C., Y.L.; Data curation: K.R., M.C., Y.L., A.M.C.J.; Writing - original draft: K.R., L.P.; Writing - review & editing: K.R., M.C., Y.L., A.M.C.J., L.P.; Supervision: L.P.; Funding acquisition: L.P.

### Funding

This work was supported by the National Institutes of Health (R01GM113230 to L.P.). Deposited in PMC for release after 12 months.

### Supplementary information

Supplementary information available online at <http://dev.biologists.org/lookup/doi/10.1242/dev.181453.supplemental>

### References

- Angelini, D. R., Smith, F. W. and Jockusch, E. L. (2012). Extent with modification: leg patterning in the beetle *tribolium castaneum* and the evolution of serial homologs. *G3 (Bethesda)* **2**, 235-248. doi:10.1534/g3.111.001537
- Aranda, M., Marques-Souza, H., Bayer, T. and Tautz, D. (2008). The role of the segmentation gene hairy in *Tribolium*. *Dev. Genes Evol.* **218**, 465-477. doi:10.1007/s00427-008-0240-1
- Auman, T. and Chipman, A. D. (2018). Growth zone segmentation in the milkweed bug *Oncopeltus fasciatus* sheds light on the evolution of insect segmentation. *BMC Evol. Biol.* **18**, 178. doi:10.1186/s12862-018-1293-z
- Auman, T., Vreede, B. M. I., Weiss, A., Hester, S. D., Williams, T. A., Nagy, L. M. and Chipman, A. D. (2017). Dynamics of growth zone patterning in the milkweed bug *Oncopeltus fasciatus*. *Dev. Camb. Engl.* **144**, 1896-1905. doi:10.1242/dev.142091
- Ben-David, J. and Chipman, A. D. (2010). Mutual regulatory interactions of the trunk gap genes during blastoderm patterning in the hemipteran *Oncopeltus fasciatus*. *Dev. Biol.* **346**, 140-149. doi:10.1016/j.ydbio.2010.07.010
- Benton, M. A., Pechmann, M., Frey, N., Stappert, D., Conrads, K. H., Chen, Y.-T., Stamatakis, E., Pavlopoulos, A. and Roth, S. (2016). Toll genes have an ancestral role in axis elongation. *Curr. Biol. CB* **26**, 1609-1615. doi:10.1016/j.cub.2016.04.055
- Bialecki, M., Shilton, A., Fichtenberg, C., Segraves, W. A. and Thummel, C. S. (2002). Loss of the ecdysteroid-inducible E75A orphan nuclear receptor uncouples molting from metamorphosis in *Drosophila*. *Dev. Cell* **3**, 209-220. doi:10.1016/S1534-5807(02)00204-6
- Buszczak, M., Freeman, M. R., Carlson, J. R., Bender, M., Cooley, L. and Segraves, W. A. (1999). Ecdysone response genes govern egg chamber development during mid-oogenesis in *Drosophila*. *Dev. Camb. Engl.* **126**, 4581-4589.
- Chipman, A. D. and Akam, M. (2008). The segmentation cascade in the centipede *Strigamia maritima*: involvement of the Notch pathway and pair-rule gene homologues. *Dev. Biol.* **319**, 160-169. doi:10.1016/j.ydbio.2008.02.038
- Chipman, A. D., Arthur, W. and Akam, M. (2004). A double segment periodicity underlies segment generation in centipede development. *Curr. Biol. CB* **14**, 1250-1255. doi:10.1016/j.cub.2004.07.026
- Choe, C. P. and Brown, S. J. (2007). Evolutionary flexibility of pair-rule patterning revealed by functional analysis of secondary pair-rule genes, paired and sloppy-paired in the short-germ insect, *Tribolium castaneum*. *Dev. Biol.* **302**, 281-294. doi:10.1016/j.ydbio.2006.09.037
- Choe, C. P., Miller, S. C. and Brown, S. J. (2006). A pair-rule gene circuit defines segments sequentially in the short-germ insect *Tribolium castaneum*. *Proc. Natl. Acad. Sci. USA* **103**, 6560-6564. doi:10.1073/pnas.0510440103
- Choe, C. P., Stellabotte, F. and Brown, S. J. (2017). Regulation and function of odd-paired in *Tribolium* segmentation. *Dev. Genes Evol.* **227**, 309-317. doi:10.1007/s00427-017-0590-7
- Clark, E. and Peel, A. D. (2018). Evidence for the temporal regulation of insect segmentation by a conserved sequence of transcription factors. *Dev. Camb. Engl.*
- Davis, G. K. and Patel, N. H. (2002). Short, long, and beyond: molecular and embryological approaches to insect segmentation. *Annu. Rev. Entomol.* **47**, 669-699. doi:10.1146/annurev.ento.47.091201.145251
- Davis, G. K., D'Alessio, J. A. and Patel, N. H. (2005). Pax3/7 genes reveal conservation and divergence in the arthropod segmentation hierarchy. *Dev. Biol.* **285**, 169-184. doi:10.1016/j.ydbio.2005.06.014
- Dawes, R., Dawson, I., Falciani, F., Tear, G. and Akam, M. (1994). Dax, a locust Hox gene related to fushi tarazu but showing no pair-rule expression. *Dev. Camb. Engl.* **120**, 1561-1572.
- Dearden, P. K., Donly, C. and Grbić, M. (2002). Expression of pair-rule gene homologues in a chelicerate: early patterning of the two-spotted spider mite *Tetranychus urticae*. *Dev. Camb. Engl.* **129**, 5461-5472. doi:10.1242/dev.00099
- DiNardo, S., Kuner, J. M., Theis, J. and O'Farrell, P. H. (1985). Development of embryonic pattern in *D. melanogaster* as revealed by accumulation of the nuclear engrailed protein. *Cell* **43**, 59-69. doi:10.1016/0092-8674(85)90012-1
- Edgar, R. C. (2004). MUSCLE: multiple sequence alignment with high accuracy and high throughput. *Nucleic Acids Res.* **32**, 1792-1797. doi:10.1093/nar/gkh340
- El-Sherif, E., Averof, M. and Brown, S. J. (2012). A segmentation clock operating in blastoderm and germband stages of *Tribolium* development. *Dev. Camb. Engl.* **139**, 4341-4346. doi:10.1242/dev.085126
- Erezylmaz, D. F., Kelstrup, H. C. and Riddiford, L. M. (2009). The nuclear receptor E75A has a novel pair-rule-like function in patterning the milkweed bug, *Oncopeltus fasciatus*. *Dev. Biol.* **334**, 300-310. doi:10.1016/j.ydbio.2009.06.038
- Ewen-Campen, B., Shaner, N., Panfilio, K. A., Suzuki, Y., Roth, S. and Extavour, C. G. (2011). The maternal and early embryonic transcriptome of the milkweed bug *Oncopeltus fasciatus*. *BMC Genomics* **12**, 61. doi:10.1186/1471-2164-12-61
- Gergen, J. P., Coulter, D. E. and Wieschaus, E. (1986). Segmental pattern and blastoderm cell identities. In *Gametogenesis and the Early Embryo* (ed. J. G. Gall), pp. 195-220. New York: Alan R. Liss, Inc.
- Graham, P. L., Anderson, W. R., Brandt, E. A., Xiang, J. and Pick, L. (2019). Dynamic expression of *Drosophila* segmental cell surface-encoding genes and their pair-rule regulators. *Dev. Biol.* **447**, 147-156. doi:10.1016/j.ydbio.2019.01.015
- Grbić, M. and Strand, M. R. (1998). Shifts in the life history of parasitic wasps correlate with pronounced alterations in early development. *Proc. Natl. Acad. Sci. USA* **95**, 1097-1101. doi:10.1073/pnas.95.3.1097
- Green, J. and Akam, M. (2013). Evolution of the pair rule gene network: Insights from a centipede. *Dev. Biol.* **382**, 235-245. doi:10.1016/j.ydbio.2013.06.017
- Guichet, A., Copeland, J. W. R., Erdélyi, M., Hlousek, D., Závorszky, P., Ho, J., Brown, S., Percival-Smith, A., Krause, H. M. and Ephrussi, A. (1997). The nuclear receptor homologue Ftz-F1 and the homeodomain protein Ftz are mutually dependent cofactors. *Nature* **385**, 548-552. doi:10.1038/385548a0
- Gutjahr, T., Frei, E. and Noll, M. (1993). Complex regulation of early paired expression: initial activation by gap genes and pattern modulation by pair-rule genes. *Dev. Camb. Engl.* **117**, 609-623.
- Haag, E. S. (2014). The same but different: worms reveal the pervasiveness of developmental system drift. *PLoS Genet.* **10**, e1004150. doi:10.1371/journal.pgen.1004150
- Heffer, A., Shultz, J. W. and Pick, L. (2010). Surprising flexibility in a conserved Hox transcription factor over 550 million years of evolution. *Proc. Natl. Acad. Sci. USA* **107**, 18040-18045. doi:10.1073/pnas.1010746107
- Heffer, A., Xiang, J. and Pick, L. (2013a). Variation and constraint in Hox gene evolution. *Proc. Natl. Acad. Sci. USA* **110**, 2211-2216. doi:10.1073/pnas.1210847110
- Heffer, A., Grubbs, N., Mahaffey, J. and Pick, L. (2013b). The evolving role of the orphan nuclear receptor ftz-f1, a pair-rule segmentation gene. *Evol. Dev.* **15**, 406-417. doi:10.1111/ede.12050
- Hughes, C. L. and Kaufman, T. C. (2000). RNAi analysis of Deformed, proboscipedia and Sex combs reduced in the milkweed bug *Oncopeltus fasciatus*: novel roles for Hox genes in the hemipteran head. *Dev. Camb. Engl.* **127**, 3683-3694.
- Janssen, R., Damen, W. G. M. and Budd, G. E. (2012). Expression of pair rule gene orthologs in the blastoderm of a myriapod: evidence for pair rule-like mechanisms? *BMC Dev. Biol.* **12**, 15. doi:10.1186/1471-213X-12-15
- Johnson, F. B., Parker, E. and Krasnow, M. A. (1995). Extracellular protein is a selective cofactor for the *Drosophila* homeotics: role of the homeodomain and YPWM amino acid motif in the interaction. *Proc. Natl. Acad. Sci. USA* **92**, 739-743. doi:10.1073/pnas.92.3.739

- Kilchherr, F., Baumgartner, S., Bopp, D., Frei, E. and Noll, M. (1986). Isolation of the paired gene of *Drosophila* and its spatial expression during early embryogenesis. *Nature* **321**, 493-499. doi:10.1038/321493a0
- Kissinger, C. R., Liu, B. S., Martin-Blanco, E., Kornberg, T. B. and Pabo, C. O. (1990). Crystal structure of an engrailed homeodomain-DNA complex at 2.8 Å resolution: a framework for understanding homeodomain-DNA interactions. *Cell* **63**, 579-590. doi:10.1016/0092-8674(90)90453-L
- Kraft, R. and Jäckle, H. (1994). *Drosophila* mode of metamerization in the embryogenesis of the lepidopteran insect *Manduca sexta*. *Proc. Natl. Acad. Sci. USA* **91**, 6634-6638. doi:10.1073/pnas.91.14.6634
- Larsson, A. (2014). AliView: a fast and lightweight alignment viewer and editor for large datasets. *Bioinforma. Oxf. Engl.* **30**, 3276-3278. doi:10.1093/bioinformatics/btu531
- Lawrence, P. A. (1966). Gradients in the insect segment: the orientation of hairs in the milkweed bug *Oncopeltus fasciatus*. *J. Exp. Biol.* **44**, 607-620.
- Lawrence, P. A. (1973). A clonal analysis of segment development in *Oncopeltus* (Hemiptera). *Development* **30**, 681-699.
- Lawrence, P. A. and Green, S. M. (1975). The anatomy of a compartment border. The intersegmental boundary in *Oncopeltus*. *J. Cell Biol.* **65**, 373-382. doi:10.1083/jcb.65.2.373
- Lawrence, P. A. and Johnston, P. (1989). Pattern formation in the *Drosophila* embryo: allocation of cells to parasegments by even-skipped and fushi tarazu. *Development* **105**, 761-767.
- Liang, P., Guo, Y., Zhou, X. and Gao, X. (2014). Expression profiling in bemisia tabaci under insecticide treatment: indicating the necessity for custom reference gene selection. *PLoS ONE* **9**, e87514. doi:10.1371/journal.pone.0087514
- Liu, P. Z. and Kaufman, T. C. (2004). hunchback is required for suppression of abdominal identity, and for proper germband growth and segmentation in the intermediate germband insect *Oncopeltus fasciatus*. *Dev. Camb. Engl.* **131**, 1515-1527. doi:10.1242/dev.01046
- Liu, P. Z. and Kaufman, T. C. (2005a). even-skipped is not a pair-rule gene but has segmental and gap-like functions in *Oncopeltus fasciatus*, an intermediate germband insect. *Dev. Camb. Engl.* **132**, 2081-2092. doi:10.1242/dev.01807
- Liu, P. Z. and Kaufman, T. C. (2005b). Short and long germ segmentation: unanswered questions in the evolution of a developmental mode. *Evol. Dev.* **7**, 629-646. doi:10.1111/j.1525-142X.2005.05066.x
- Liu, P. and Kaufman, T. C. (2009). In situ hybridization of large milkweed bug (*Oncopeltus*) tissues. *Cold Spring Harb. Protoc.* **2009**, pdb.prot5262. doi:10.1101/pdb.prot5262
- Milne, I., Lindner, D., Bayer, M., Husmeier, D., McGuire, G., Marshall, D. F. and Wright, F. (2009). TOPALi v2: a rich graphical interface for evolutionary analyses of multiple alignments on HPC clusters and multi-core desktops. *Bioinforma. Oxf. Engl.* **25**, 126-127. doi:10.1093/bioinformatics/btn575
- Misof, B., Liu, S., Meusemann, K., Peters, R. S., Donath, A., Mayer, C., Frandsen, P. B., Ware, J., Flouri, T., Beutel, R. G. et al. (2014). Phylogenomics resolves the timing and pattern of insect evolution. *Science* **346**, 763-767. doi:10.1126/science.1257570
- Mito, T., Okamoto, H., Shinahara, W., Shinmyo, Y., Miyawaki, K., Ohuchi, H. and Noji, S. (2006). Krüppel acts as a gap gene regulating expression of hunchback and even-skipped in the intermediate germ cricket *Gryllus bimaculatus*. *Dev. Biol.* **294**, 471-481. doi:10.1016/j.ydbio.2005.12.057
- Mito, T., Kobayashi, C., Sarashina, I., Zhang, H., Shinahara, W., Miyawaki, K., Shinmyo, Y., Ohuchi, H. and Noji, S. (2007). even-skipped has gap-like, pair-rule-like, and segmental functions in the cricket *Gryllus bimaculatus*, a basal, intermediate germ insect (Orthoptera). *Dev. Biol.* **303**, 202-213. doi:10.1016/j.ydbio.2006.11.003
- Nakao, H. (2010). Characterization of *Bombyx* embryo segmentation process: expression profiles of engrailed, even-skipped, caudal, and wnt1/wingless homologues. *J. Exp. Zool. B Mol. Dev. Evol.* **314**, 224-231. doi:10.1002/jez.b.21328
- Nakao, H. (2015). Analyses of interactions among pair-rule genes and the gap gene Krüppel in *Bombyx* segmentation. *Dev. Biol.* **405**, 149-157. doi:10.1016/j.ydbio.2015.06.012
- Niu, J., Cappelle, K., de Miranda, J. R., Smagghe, G. and Meeus, I. (2014). Analysis of reference gene stability after Israeli acute paralysis virus infection in bumblebees *Bombus terrestris*. *J. Invertebr. Pathol.* **115**, 76-79. doi:10.1016/j.jip.2013.10.011
- Osborne, P. W. and Dearden, P. K. (2005). Expression of Pax group III genes in the honeybee (*Apis mellifera*). *Dev. Genes Evol.* **215**, 499-508. doi:10.1007/s00427-005-0008-9
- Panfilio, K. A., Vargas Jentsch, I. M., Benoit, J. B., Erezylmaz, D., Suzuki, Y., Colella, S., Robertson, H. M., Poelchau, M. F., Waterhouse, R. M., Ioannidis, P. et al. (2019). Molecular evolutionary trends and feeding ecology diversification in the Hemiptera, anchored by the milkweed bug genome. *Genome Biol.* **20**, 64. doi:10.1186/s13059-019-1660-0
- Paré, A. C., Vichas, A., Fincher, C. T., Mirman, Z., Farrell, D. L., Mainieri, A. and Zallen, J. A. (2014). A positional Toll receptor code directs convergent extension in *Drosophila*. *Nature* **515**, 523-527. doi:10.1038/nature13953
- Patel, N. H., Ball, E. E. and Goodman, C. S. (1992). Changing role of even-skipped during the evolution of insect pattern formation. *Nature* **357**, 339-342. doi:10.1038/357339a0
- Preibisch, S., Saalfeld, S. and Tomancak, P. (2009). Globally optimal stitching of tiled 3D microscopic image acquisitions. *Bioinforma. Oxf. Engl.* **25**, 1463-1465. doi:10.1093/bioinformatics/btp184
- Pueyo, J. I., Lanfear, R. and Couso, J. P. (2008). Ancestral Notch-mediated segmentation revealed in the cockroach *Periplaneta americana*. *Proc. Natl. Acad. Sci. USA* **105**, 16614-16619. doi:10.1073/pnas.0804093105
- Ronquist, F. and Huelsenbeck, J. P. (2003). MrBayes 3: Bayesian phylogenetic inference under mixed models. *Bioinforma. Oxf. Engl.* **19**, 1572-1574. doi:10.1093/bioinformatics/btg180
- Rosenberg, M. I., Brent, A. E., Payre, F. and Desplan, C. (2014). Dual mode of embryonic development is highlighted by expression and function of *Nasonia* pair-rule genes. *eLife* **3**, e01440. doi:10.7554/eLife.01440
- Sarrazin, A. F., Peel, A. D. and Averof, M. (2012). A segmentation clock with two-segment periodicity in insects. *Science* **336**, 338-341. doi:10.1126/science.1218256
- Scott, M. P. and Carroll, S. B. (1987). The segmentation and homeotic gene network in early *Drosophila* development. *Cell* **51**, 689-698. doi:10.1016/0092-8674(87)90092-4
- Segraves, W. A. and Hogness, D. S. (1990). The E75 ecdysone-inducible gene responsible for the 75B early puff in *Drosophila* encodes two new members of the steroid receptor superfamily. *Genes Dev.* **4**, 204-219. doi:10.1101/gad.4.2.204
- Tamura, K., Stecher, G., Peterson, D., Filipski, A. and Kumar, S. (2013). MEGA6: Molecular Evolutionary Genetics Analysis version 6.0. *Mol. Biol. Evol.* **30**, 2725-2729. doi:10.1093/molbev/mst197
- Telford, M. J. (2000). Evidence for the derivation of the *Drosophila* fushi tarazu gene from a Hox gene orthologous to lophotrochozoan *Lox5*. *Curr. Biol. CB* **10**, 349-352. doi:10.1016/S0960-9822(00)00387-0
- True, J. R. and Haag, E. S. (2001). Developmental system drift and flexibility in evolutionary trajectories. *Evol. Dev.* **3**, 109-119. doi:10.1046/j.1525-142x.2001.003002.109.x
- Wieschaus, E. and Nüsslein-Volhard, C. (2016). The heidelberg screen for pattern mutants of *Drosophila*: a personal account. *Annu. Rev. Cell Dev. Biol.* **32**, 1-46. doi:10.1146/annurev-cellbio-113015-023138
- Wilk, R., Hu, J. and Krause, H. M. (2013). Spatial profiling of nuclear receptor transcription patterns over the course of *Drosophila* development. *G3 Bethesda Md* **3**, 1177-1189. doi:10.1534/g3.113.006023
- Wilson, M. J. and Dearden, P. K. (2012). Pair-rule gene orthologues have unexpected maternal roles in the honeybee (*Apis mellifera*). *PLoS ONE* **7**, e46490. doi:10.1371/journal.pone.0046490
- Xiang, J., Forrest, I. S. and Pick, L. (2015). *Dermestes maculatus*: an intermediate-germ beetle model system for evo-devo. *EvoDevo* **6**, 32. doi:10.1186/s13227-015-0028-0
- Xiang, J., Reding, K., Heffer, A. and Pick, L. (2017). Conservation and variation in pair-rule gene expression and function in the intermediate-germ beetle, *Dermestes maculatus*. *Dev. Camb. Engl.* **144**, 4625-4636. doi:10.1242/dev.154039
- Xu, J., Tan, A. and Palli, S. R. (2010). The function of nuclear receptors in regulation of female reproduction and embryogenesis in the red flour beetle, *Tribolium castaneum*. *J. Insect Physiol.* **56**, 1471-1480. doi:10.1016/j.jinsphys.2010.04.004
- Yeates, D. K., Cameron, S. L. and Trautwein, M. (2012). A view from the edge of the forest: recent progress in understanding the relationships of the insect orders. *Aust. J. Entomol.* **51**, 79-87. doi:10.1111/j.1440-6055.2012.00857.x
- Yu, Y., Li, W., Su, K., Yussa, M., Han, W., Perrimon, N. and Pick, L. (1997). The nuclear hormone receptor Ftz-F1 is a cofactor for the *Drosophila* homeodomain protein Ftz. *Nature* **385**, 552-555. doi:10.1038/385552a0
- Yussa, M., Löhr, U., Su, K. and Pick, L. (2001). The nuclear receptor Ftz-F1 and homeodomain protein Ftz interact through evolutionarily conserved protein domains. *Mech. Dev.* **107**, 39-53. doi:10.1016/S0925-4773(01)00448-8
- Zhai, Y., Lin, Q., Zhou, X., Zhang, X., Liu, T. and Yu, Y. (2014). Identification and validation of reference genes for quantitative real-time PCR in *Drosophila* suzukii (Diptera: Drosophilidae). *PLoS ONE* **9**, e106800. doi:10.1371/journal.pone.0106800
